# Supplementary material for: Evolution of pain at 3 months by oral resveratrol in knee osteoarthritis (ARTHROL): protocol for a multicentre randomised double-blind placebo-controlled trial
Source: PubMed Central journal article supplement — BMJ Open. 2017 Sep 29;7(9):e017652. doi: 10.1136/bmjopen-2017-017652 (PMC5640106; doi:10.1136/bmjopen-2017-017652), 2017-09-29
Supplement: bmjopen-2017-017652supp001.pdf [file bmjopen-2017-017652supp001.pdf]

## **Appendix 1. Additional inclusion and non-inclusion criteria.**

|                                                                                                                                                                                                                                                                                                                                                                                                                                                                                                                                                                                                                              |
|------------------------------------------------------------------------------------------------------------------------------------------------------------------------------------------------------------------------------------------------------------------------------------------------------------------------------------------------------------------------------------------------------------------------------------------------------------------------------------------------------------------------------------------------------------------------------------------------------------------------------|
| <b>Inclusion criteria</b>                                                                                                                                                                                                                                                                                                                                                                                                                                                                                                                                                                                                    |
| Age $\geq$ 40 years-old<br>Written consent obtained<br>Health insurance coverage                                                                                                                                                                                                                                                                                                                                                                                                                                                                                                                                             |
| <b>Non-inclusion criteria</b>                                                                                                                                                                                                                                                                                                                                                                                                                                                                                                                                                                                                |
| History of symptomatic crystal or inflammatory arthritis<br>Knee surgery $\leq$ 1 year<br>Knee intra-articular injection of corticosteroids and/or hyaluronic acid $\leq$ 2 months<br>Current use of intramuscular, intravenous or oral corticosteroids<br>Uncontrolled diseases that may require intramuscular, intravenous or oral corticosteroids<br>Knee trauma $\leq$ 2 months<br>Neurologic disorders involving the lower limbs<br>Inability to speak, write or read French language<br>Participation in another biomedical research<br>Contraindication to resveratrol or hypersensitivity to any of its constituents |

## Appendix 2. Information about pre-specified outcomes

**WOMAC questionnaire.** The WOMAC questionnaire is a self-administered, disease-specific instrument validated for OA. It consists of 24 items grouped into 3 subscales: pain (5 questions), stiffness (2 questions) and physical function (17 questions), with higher scores indicating greater disease severity.

**OARSI-OMERACT response.** The OARSI-OMERACT response to intervention will be defined as an improvement in pain (assessed by an 11-point pain NRS) or in function (assessed by the WOMAC function subscore)  $\geq 50\%$  and absolute change  $\geq 20$ , or improvement in at least 2 of the 3 following: 1) pain  $\geq 20\%$  and absolute change  $\geq 10$ , 2) function  $\geq 20\%$  and absolute change  $\geq 10$ , 3) patient global assessment (assessed by an 11-point global assessment NRS)  $\geq 20\%$  and absolute change  $\geq 10$ .

**NRS:** numeric rating scale; **OARSI:** Osteoarthritis Research Society International; **OMERACT:** Outcome Measures in Rheumatology; **WOMAC:** Western Ontario and McMaster Universities Arthritis Index.

**Appendix 3. World Health Organisation–Uppsala Monitoring Centre causality categories (extract).**

| <b>Causality term</b>                                  | <b>Assessment criteria*</b>                                                                                                                                                                                                                                                                                                                                                                                                              |
|--------------------------------------------------------|------------------------------------------------------------------------------------------------------------------------------------------------------------------------------------------------------------------------------------------------------------------------------------------------------------------------------------------------------------------------------------------------------------------------------------------|
| <b>Certain</b>                                         | <p>Event or laboratory test abnormality, with plausible time relationship to drug intake</p> <p>Cannot be explained by disease or other drugs</p> <p>Response to withdrawal plausible (pharmacologically, pathologically)</p> <p>Event definitive pharmacologically or phenomenologically (i.e. an objective and specific medical disorder or a recognized pharmacological phenomenon)</p> <p>Rechallenge satisfactory, if necessary</p> |
| <b>Probable/likely</b>                                 | <p>Event or laboratory test abnormality, with reasonable time relationship to drug intake</p> <p>Unlikely to be attributed to disease or other drugs</p> <p>Response to withdrawal clinically reasonable</p> <p>Rechallenge not required</p>                                                                                                                                                                                             |
| <b>Possible</b>                                        | <p>Event or laboratory test abnormality, with reasonable time relationship to drug intake</p> <p>Could also be explained by disease or other drugs</p> <p>Information on drug withdrawal may be lacking or unclear</p>                                                                                                                                                                                                                   |
| <b>Unlikely (not excluded)</b>                         | <p>Event or laboratory test abnormality, with a time to drug intake that makes a relationship improbable (but not impossible)</p> <p>Disease or other drugs provide plausible explanations</p>                                                                                                                                                                                                                                           |
| <p>*All points should be reasonably complied with.</p> |                                                                                                                                                                                                                                                                                                                                                                                                                                          |

#### Appendix 4. Expected nature of a suspected adverse reaction.

| Suspected adverse reaction                                   |
|--------------------------------------------------------------|
| Dizziness                                                    |
| Epidymitis                                                   |
| Erythematous                                                 |
| Headache                                                     |
| Interactions with macrolides                                 |
| Myalgia of the lower extremities                             |
| Nasopharyngitis                                              |
| Nephrotoxicity was reported in <i>in vivo</i> animal studies |
| Rash                                                         |
| Somnolence                                                   |
